# Supplementary material for: A urinary metabolomics study of rats after the exposure to acrylamide by ultra performance liquid chromatography coupled with quadrupole time-of-flight tandem mass spectrometry
Source: Royal Society of Chemistry journal article supplement (doi:10.1039/c4mb00682h), 2015-02-10
Supplement: c4mb00682h1.pdf [file c4mb00682h1.pdf]

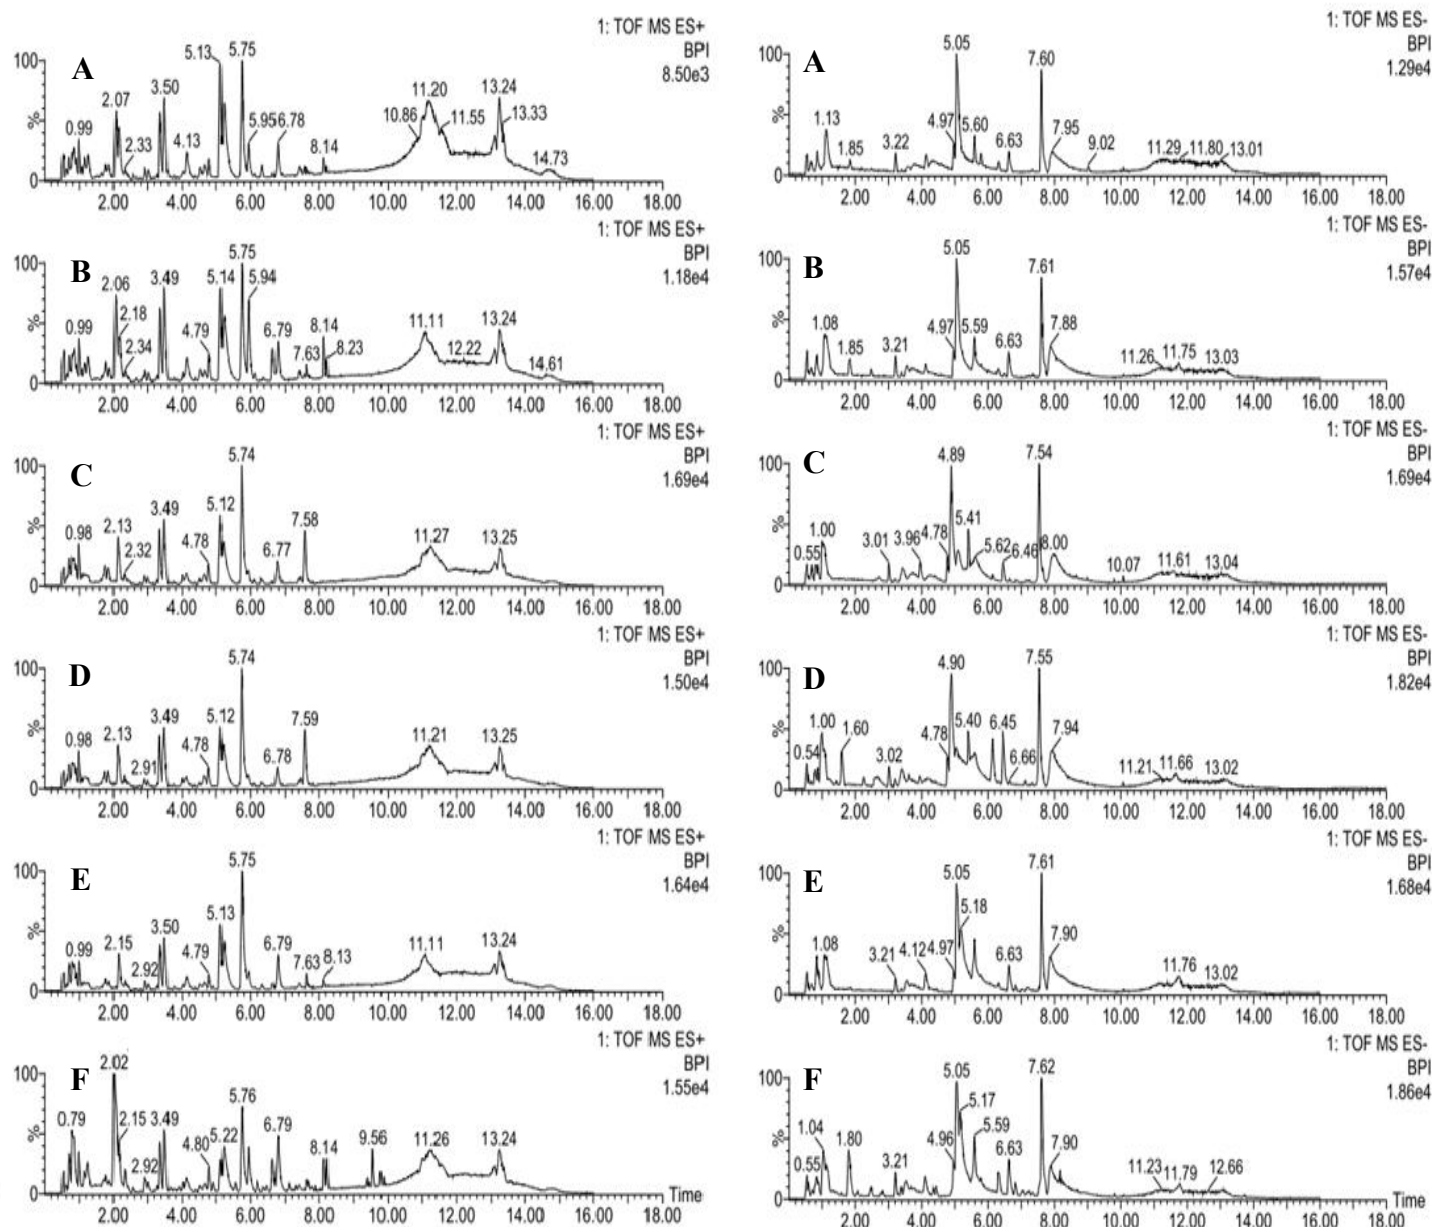

Figure 1. The base peak intensity (BPI) chromatogram of urine in rats. A, 10 days non-dosed group; B, 10 days ACR-dosed group; C, 20 days non-dosed group; D, 20 days ACR-dosed group; E, 40 days non-dosed group; F, 40 days ACR-dosed group.

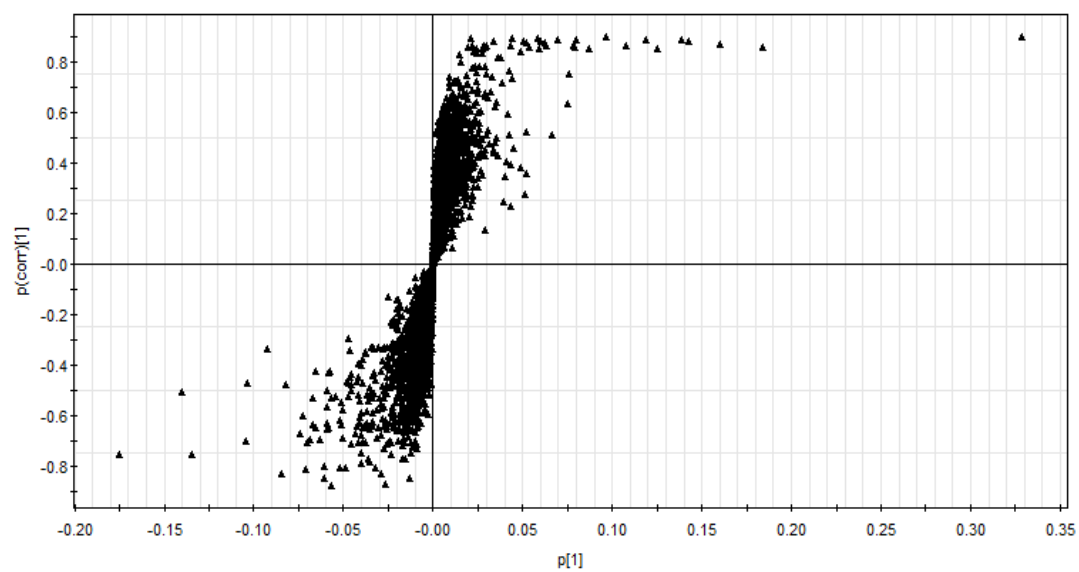

Figure 2. PCA-X Loading plots derived from UPLC-MS data of urine samples in positive ionization mode.

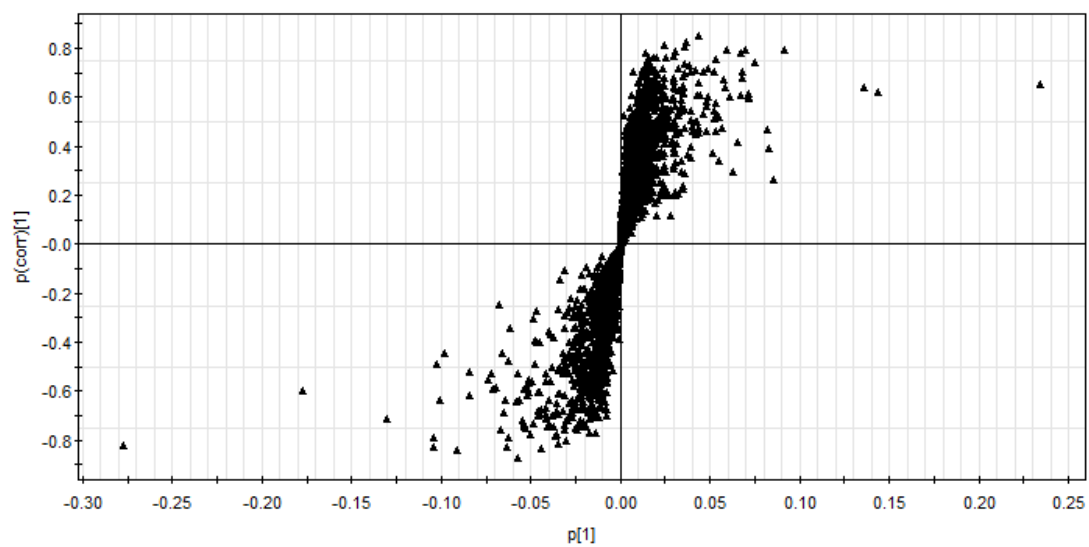

Figure 3. PCA-X Loading plots derived from UPLC-MS data of urine samples in negative ionization mode.

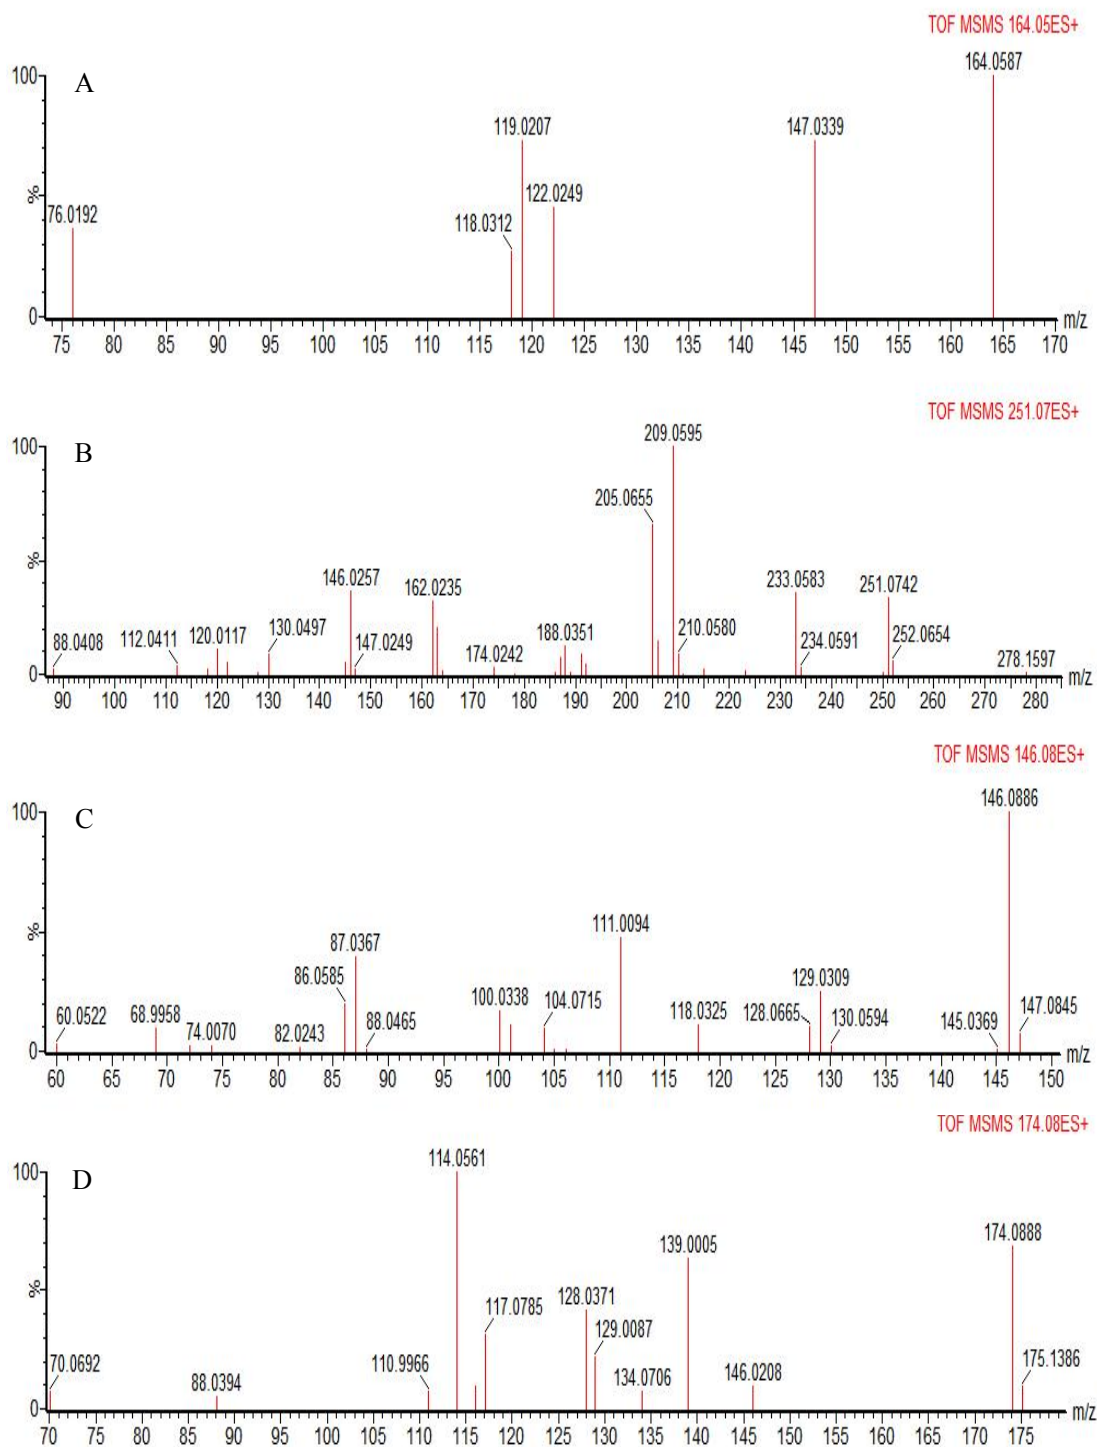

Figure 4 TOF MSMS spectrums of compounds in positive ionization mode

Note: A, pterin; B, G-Glutamylcysteine; C, 4-Guanidinobutanoic acid; D, 2-Oxoarginine.

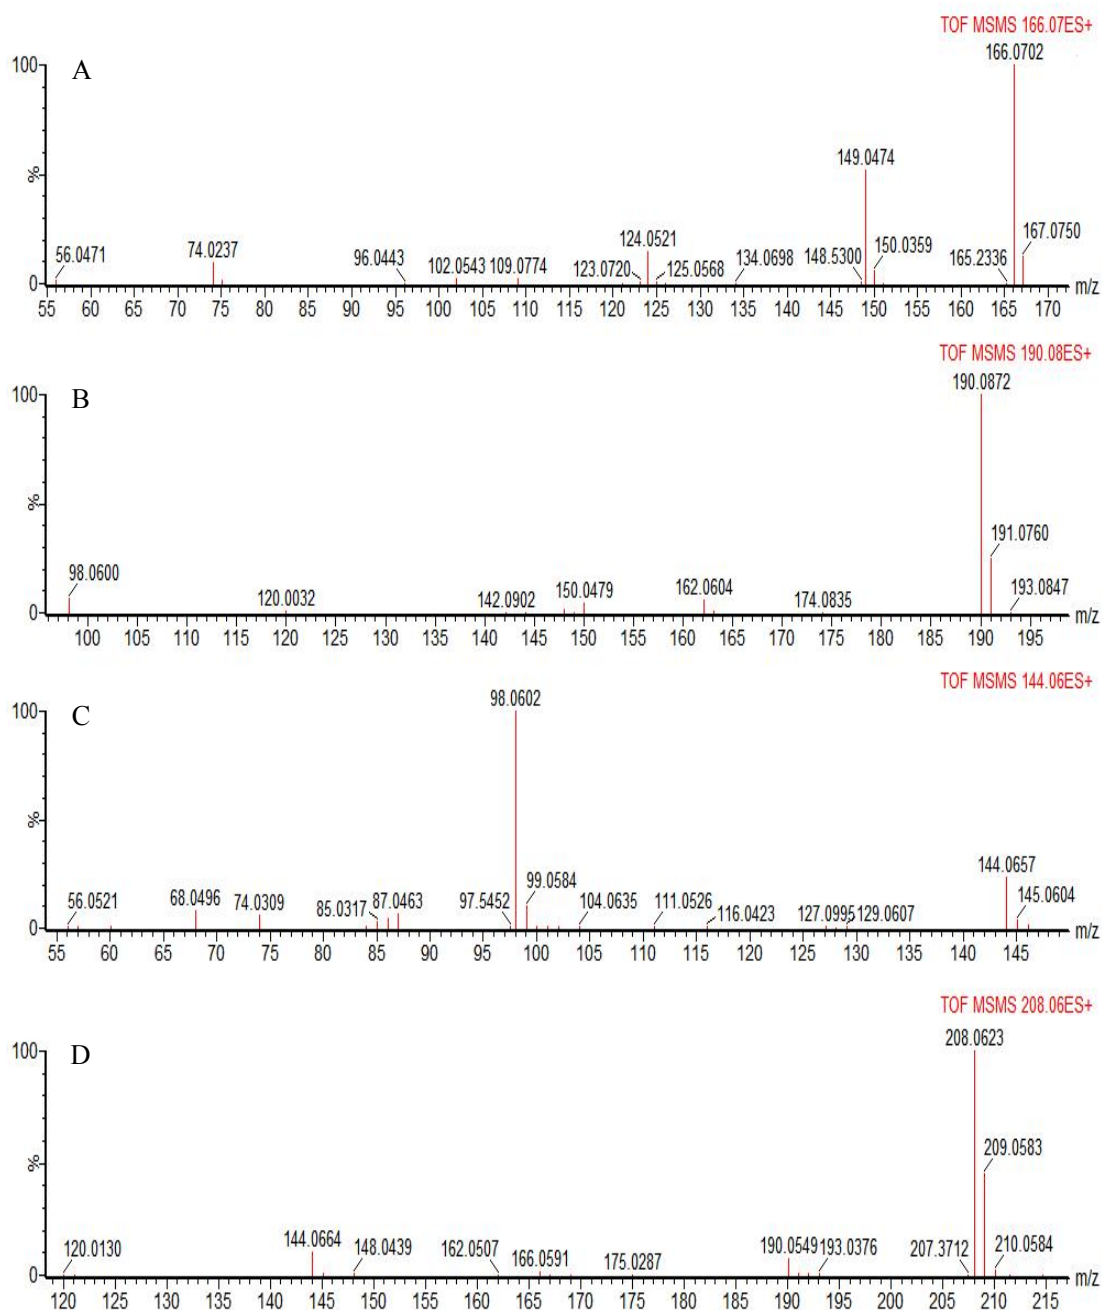

Figure 5 TOF MSMS spectrums of compounds in positive ionization mode

Note: A, 1-Methylguanine; B, 3-Indolepropionic acid; C, vinylacetyl glycine; D, 4-(2-Amino phenyl)-2, 4-dioxobutanoic acid.

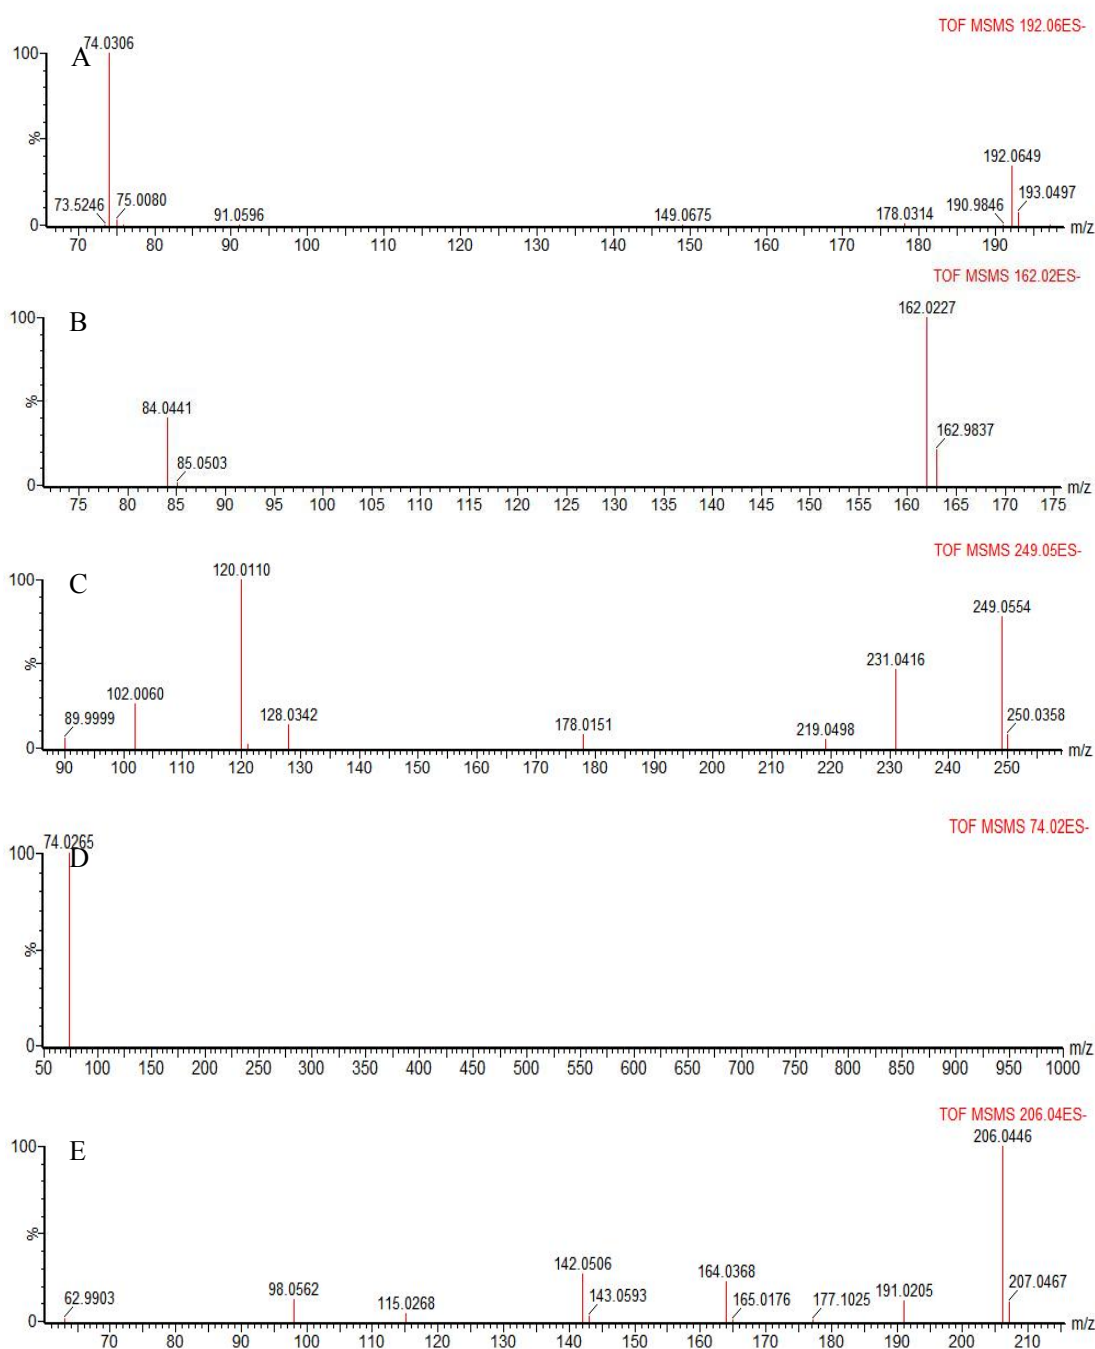

Figure 6 TOF MSMS spectrums of compounds in negative ionization mode

Note: A, phenylacetylglycine; B, acetylcysteine; C, G-Glutamylcysteine; D, glycine; E, 4-(2-Aminophenyl)-2, 4-dioxobutanoic acid.
